# Supplementary material
Source: PubMed Central journal article supplement (PMC9500110)
Supplement: NIHMS1791914-supplement-1.pdf [file NIHMS1791914-supplement-1.pdf]

Supplementary Table 1: Extra-intestinal Symptom Questionnaire

|                             | <b>0</b><br>Not present | <b>1</b><br>Minimal | <b>2</b> | <b>3</b> | <b>4</b> | <b>5</b><br>Very severe |
|-----------------------------|-------------------------|---------------------|----------|----------|----------|-------------------------|
| 1. Bad dreams               |                         |                     |          |          |          |                         |
| 2. Excessive sleepiness     |                         |                     |          |          |          |                         |
| 3. Insomnia                 |                         |                     |          |          |          |                         |
| 4. Fatigue                  |                         |                     |          |          |          |                         |
| 5. Inability to concentrate |                         |                     |          |          |          |                         |
| 6. Irritability             |                         |                     |          |          |          |                         |
| 7. Dry mouth                |                         |                     |          |          |          |                         |
| 8. Headache                 |                         |                     |          |          |          |                         |
| 9. Weakness                 |                         |                     |          |          |          |                         |
| 10. Dizziness               |                         |                     |          |          |          |                         |
| 11. Joint pain              |                         |                     |          |          |          |                         |
| 12. Muscle pain             |                         |                     |          |          |          |                         |
| 13. Nasal congestion        |                         |                     |          |          |          |                         |
| 14. Skin rash               |                         |                     |          |          |          |                         |
| 15. Bruising                |                         |                     |          |          |          |                         |

Supplementary Table 2: Percentage of participants reporting new/worse and better/unchanged/resolved symptoms

|       |                              | Percentage of participants who reported <b>new/worse</b> symptoms at the End of Study (week 6) |            |            | Percentage of participants with symptoms at baseline who reported <b>better/unchanged/resolved</b> symptoms at the End of Study (week 6) |            |            |
|-------|------------------------------|------------------------------------------------------------------------------------------------|------------|------------|------------------------------------------------------------------------------------------------------------------------------------------|------------|------------|
|       |                              | DBM (n=30)                                                                                     | DBP (n=71) | TAU (n=72) | DBM (n=30)                                                                                                                               | DBP (n=71) | TAU (n=72) |
| SLEEP | Bad dreams (%)               | 3.3                                                                                            | 11.3       | 15.3       | 36.7                                                                                                                                     | 35.2       | 37.5       |
|       | Excessive sleepiness (%)     | 16.7                                                                                           | 12.7       | 11.1       | 40.0                                                                                                                                     | 33.8       | 41.7       |
|       | Insomnia (%)                 | 10.0                                                                                           | 11.3       | 12.5       | 36.7                                                                                                                                     | 31.0       | 36.1       |
|       | Fatigue (%)                  | 0.0                                                                                            | 23.9       | 18.1       | 63.3                                                                                                                                     | 45.1       | 62.5       |
| NEURO | Inability to concentrate (%) | 3.3                                                                                            | 18.3       | 8.3        | 43.3                                                                                                                                     | 36.6       | 31.9       |
|       | Irritability (%)             | 0.0                                                                                            | 7.0        | 15.3       | 33.3                                                                                                                                     | 40.8       | 37.5       |
|       | Dry mouth (%)                | 6.7                                                                                            | 7.0        | 11.1       | 26.7                                                                                                                                     | 22.5       | 20.8       |
|       | Headache (%)                 | 13.3                                                                                           | 16.9       | 16.7       | 33.3                                                                                                                                     | 31.0       | 38.9       |
|       | Weakness (%)                 | 6.7                                                                                            | 1.4        | 2.8        | 13.3                                                                                                                                     | 14.1       | 23.6       |
|       | Dizziness (%)                | 10.0                                                                                           | 5.6        | 8.3        | 23.3                                                                                                                                     | 19.7       | 22.2       |
| MSK   | Joint pain (%)               | 3.3                                                                                            | 7.0        | 11.1       | 33.3                                                                                                                                     | 32.4       | 29.2       |
|       | Muscle pain (%)              | 6.7                                                                                            | 8.5        | 9.7        | 26.7                                                                                                                                     | 28.2       | 26.4       |
| RESP  | Nasal congestion (%)         | 10.0                                                                                           | 25.4       | 20.8       | 40.0                                                                                                                                     | 31.0       | 29.2       |
| DERM  | Skin rash (%)                | 10.0                                                                                           | 4.2        | 4.2        | 6.7                                                                                                                                      | 15.5       | 13.9       |
|       | Bruising (%)                 | 0.0                                                                                            | 7.0        | 8.3        | 13.3                                                                                                                                     | 11.3       | 6.9        |

DBP = Double Blind Placebo; DPM = Double Blind Mint; TAU=Treatment as Usual
